# Supplementary material for: Rhomboid Family Pseudoproteases Use the ER Quality Control Machinery to Regulate Intercellular Signaling
Source: PubMed Central journal article supplement (PMC3149277; doi:10.1016/j.cell.2011.02.047), 2011-04-01
Supplement: mmc1.pdf [file mmc1.pdf]

**Table S1. Genetic Interaction between *Drosophila* iRhom and Non-EGFR Signaling Pathways, Related to Figure 4**

A number of genes with known roles in developmental signaling were tested for their ability to interact genetically with homozygous *iRhom* mutants. *iRhom* homozygosity did not modify the phenotypes of indicated mutations (Mao and Freeman, 2009; Freeman and Bienz, 2001).

| Signalling pathway | Mutation tested                                                                                                                                | Genetic interaction |
|--------------------|------------------------------------------------------------------------------------------------------------------------------------------------|---------------------|
| Wg                 | <i>F76e</i> , <i>pygo</i> <sup>S123</sup> , $\Delta$ <i>axin</i> <sup>P</sup> , $\Delta$ <i>TCF</i> <sup>2</sup> ,<br><i>UAS-cadi, en-Gal4</i> | No                  |
| Notch              | <i>Df</i> <sup>rev10</sup> , <i>GMR-Su(H)DN</i> , <i>N</i> <sup>55e11</sup> ,<br><i>Hairless</i> <sup>P141</sup>                               | No                  |
| Hedgehog           | <i>hh</i> <sup>21</sup> , <i>ptc</i> <sup>9</sup> , <i>UAS-Smo5A, C765-Gal4</i>                                                                | No                  |
| Dpp                | <i>mad</i> <sup>12</sup> , <i>dpp</i> <sup>hr92</sup>                                                                                          | No                  |
